# Supplementary material for: The demographic features, clinicopathologic characteristics, treatment outcome and disease-specific prognostic factors of solitary fibrous tumor: a population-based analysis
Source: PubMed Central journal article supplement (PMC4747195; doi:10.18632/oncotarget.6174), 2015-10-19
Supplement: oncotarget-06-41875-s001.pdf [file oncotarget-06-41875-s001.pdf]

# The demographic features, clinicopathologic characteristics, treatment outcome and disease-specific prognostic factors of solitary fibrous tumor: a population-based analysis

## Supplementary Material

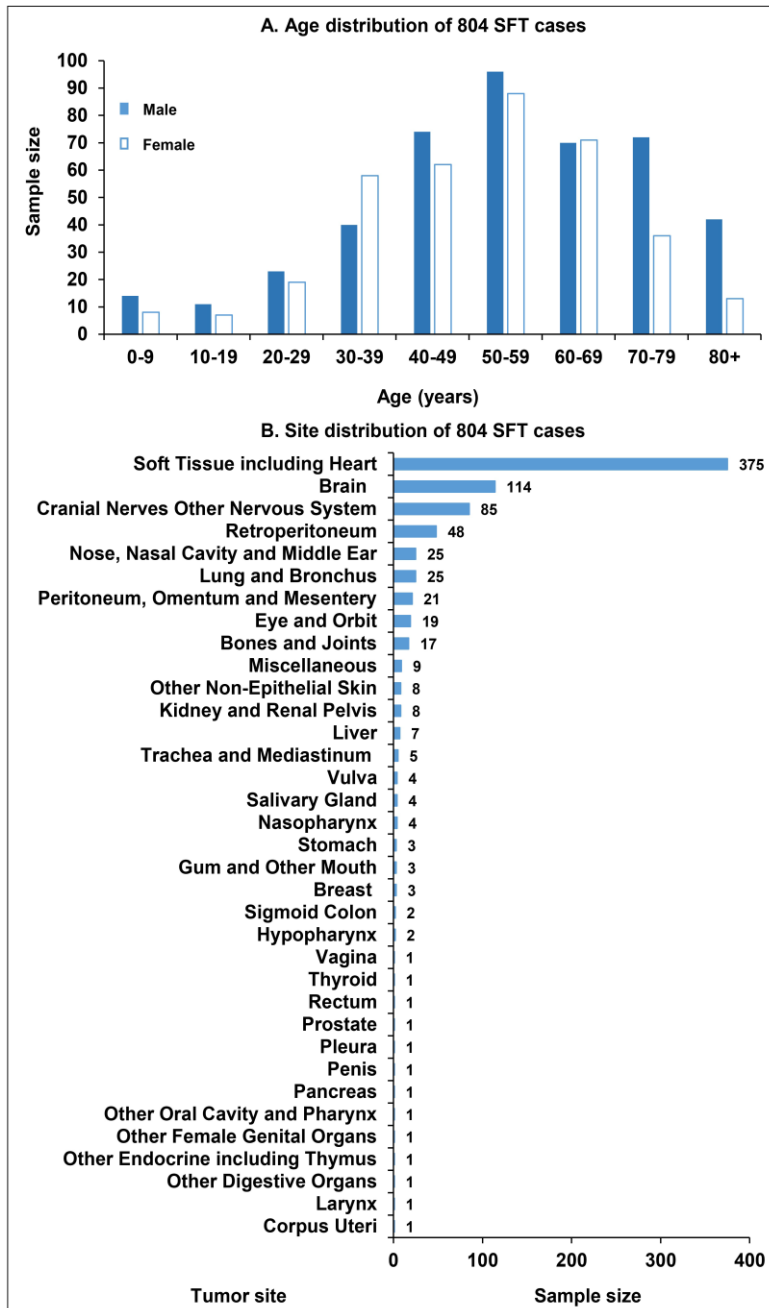

Supplementary figure 1: Age and primary tumor site distribution of 804 patients with solitary fibrous tumor.

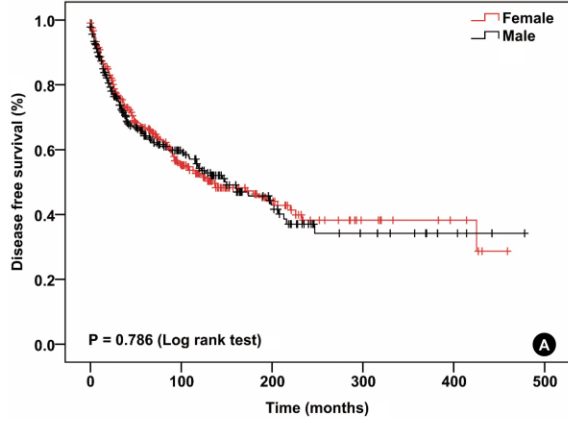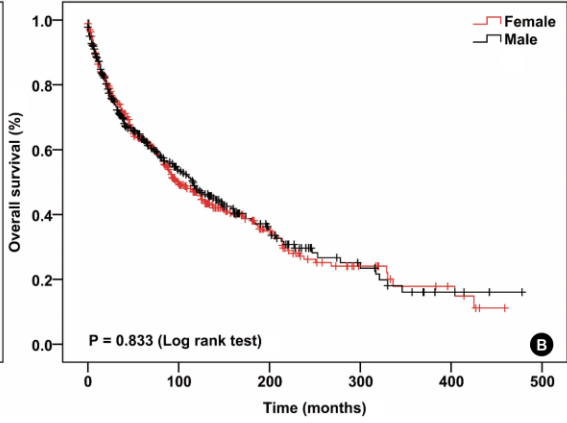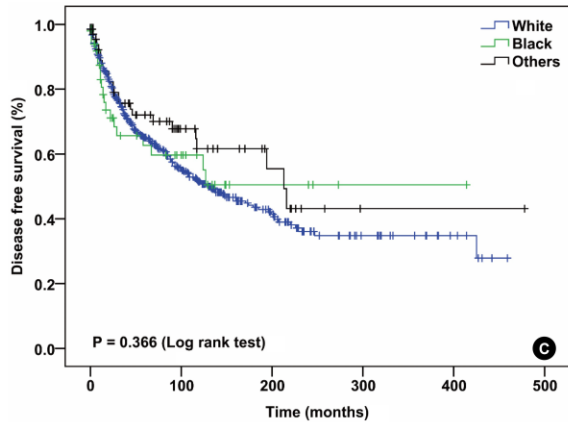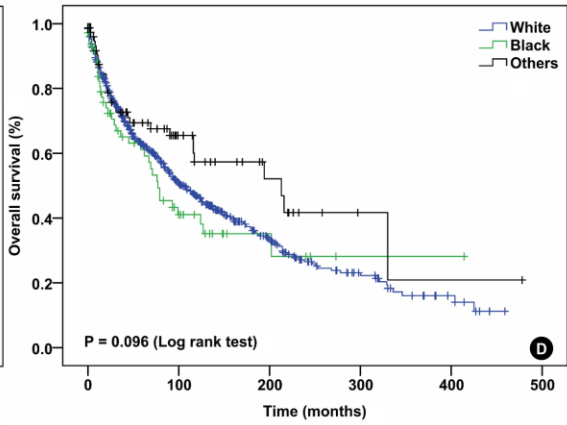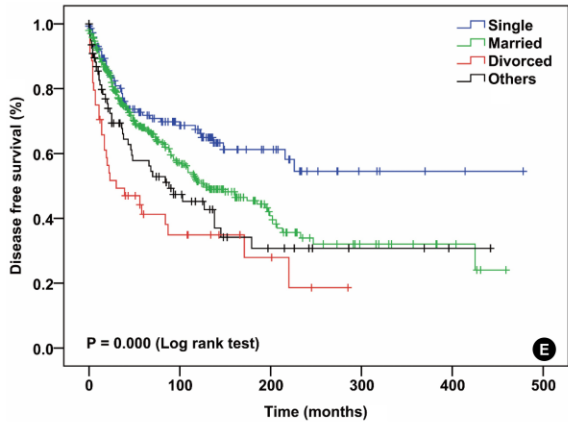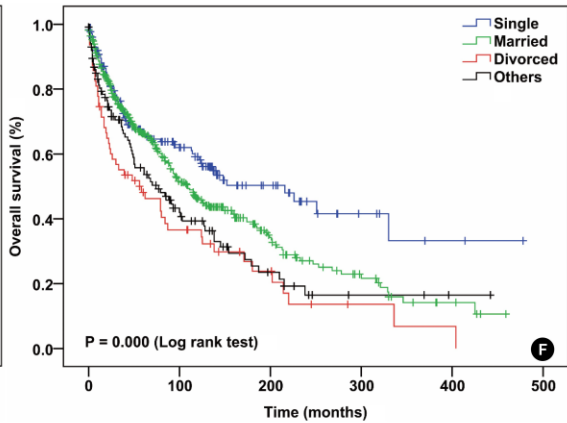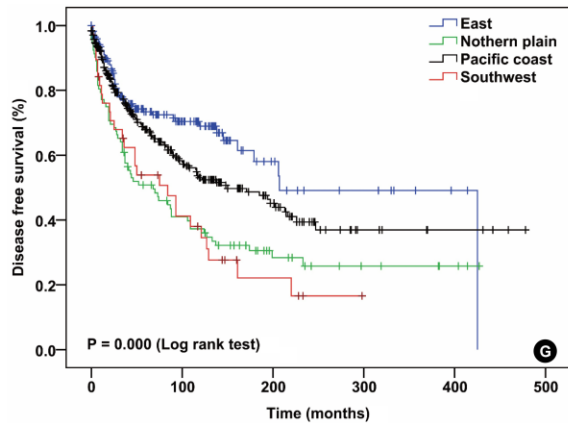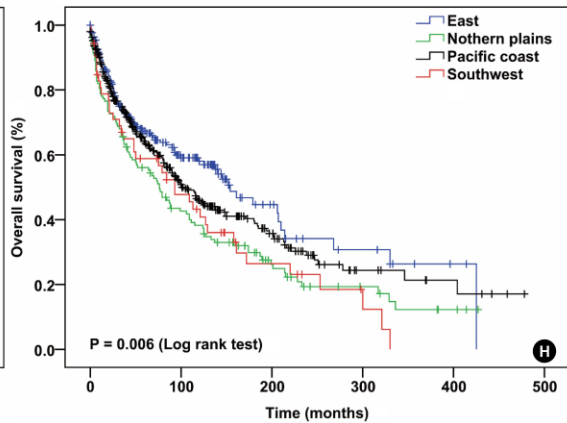

**Supplementary figure 2:** Disease free and overall survival curves of patients with solitary fibrous tumor compared according to (A) and (B) gender, (C) and (D) race, (E) and (F) marital status and (G) and (H) contract health service delivery areas. Log-rank test was used to compare curves, and significance (*P* value) is shown on each panel.
